# Supplementary material
Source: Royal Society of Chemistry journal article supplement (doi:10.1039/d6nr00350h)
Supplement: d6nr00350h1.pdf [file d6nr00350h1.pdf]

# **Preferential Outward Diffusion of Ni in CuNi Alloy Proliferates Active Sites by An Order of Magnitude for OER and MOR**

Roshini Arulraj<sup>a</sup>, Tumpa Sadhukhan<sup>a\*</sup> and Anantharaj Sengeni<sup>b\*</sup>

<sup>a</sup>Theoretical and Computational Materials Chemistry Laboratory, Department of Chemistry, SRM Institute of Science and Technology, Kattankulathur 603203, Tamil Nadu, India

<sup>b</sup>Laboratory for Electrocatalysis and Energy, Department of Chemistry, Indian Institute of Technology, Kanpur 208 016, Uttar Pradesh, India

\* Correspondence should be addressed to: [tumpas@srmist.edu.in](mailto:tumpas@srmist.edu.in), and [ananths@iitk.ac.in](mailto:ananths@iitk.ac.in)

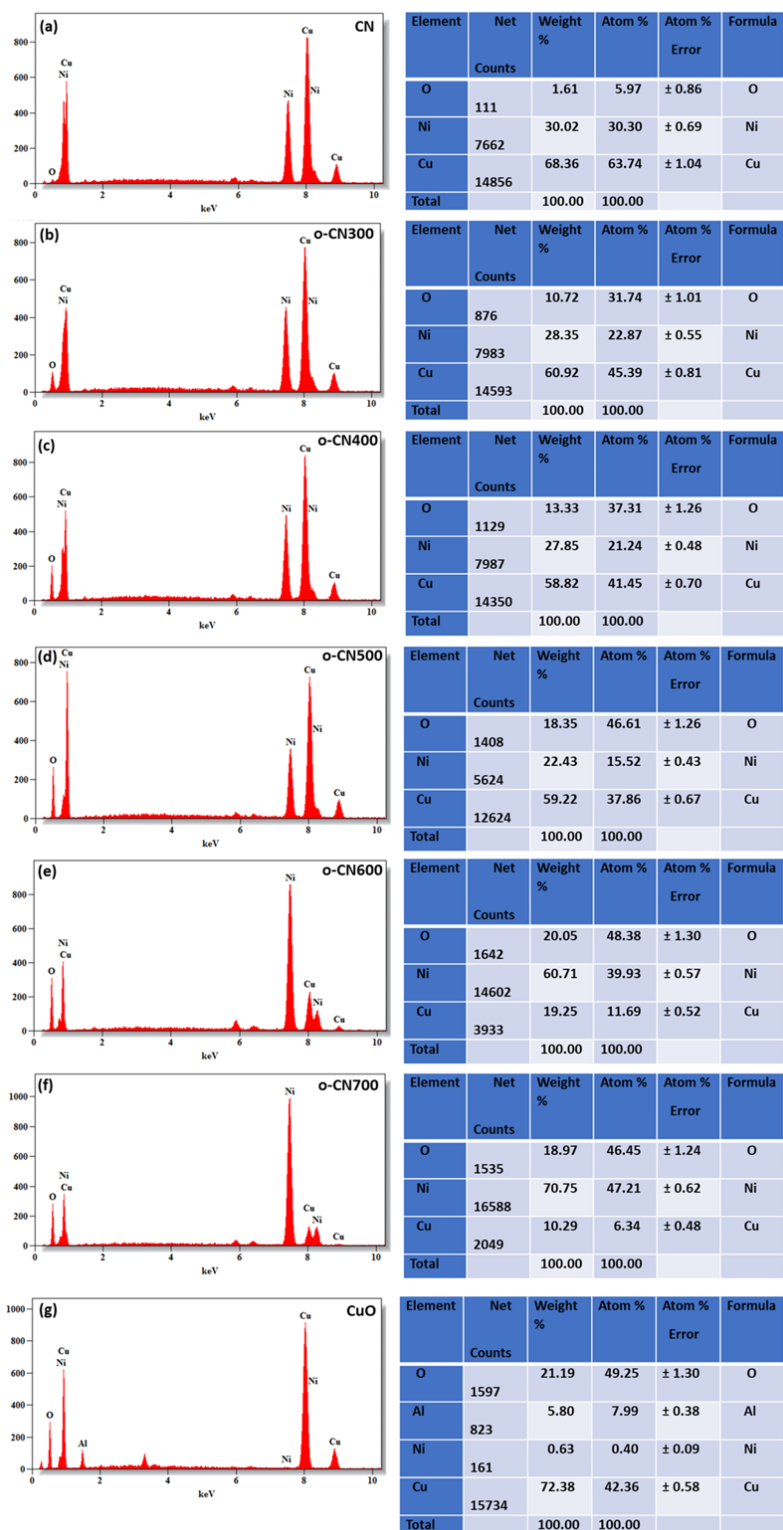

**Figure S1:** EDX spectra and corresponding elemental mapping of CN electrodes annealed at different temperatures: (a) pristine CN, (b) o-CN300, (c) o-CN400, (d) o-CN500, o-CN600, (e) o-CN700, and (g) peeled-off CuO. The maps show the distribution of Cu, Ni, and O, illustrating progressive surface oxidation with increasing annealing temperature.

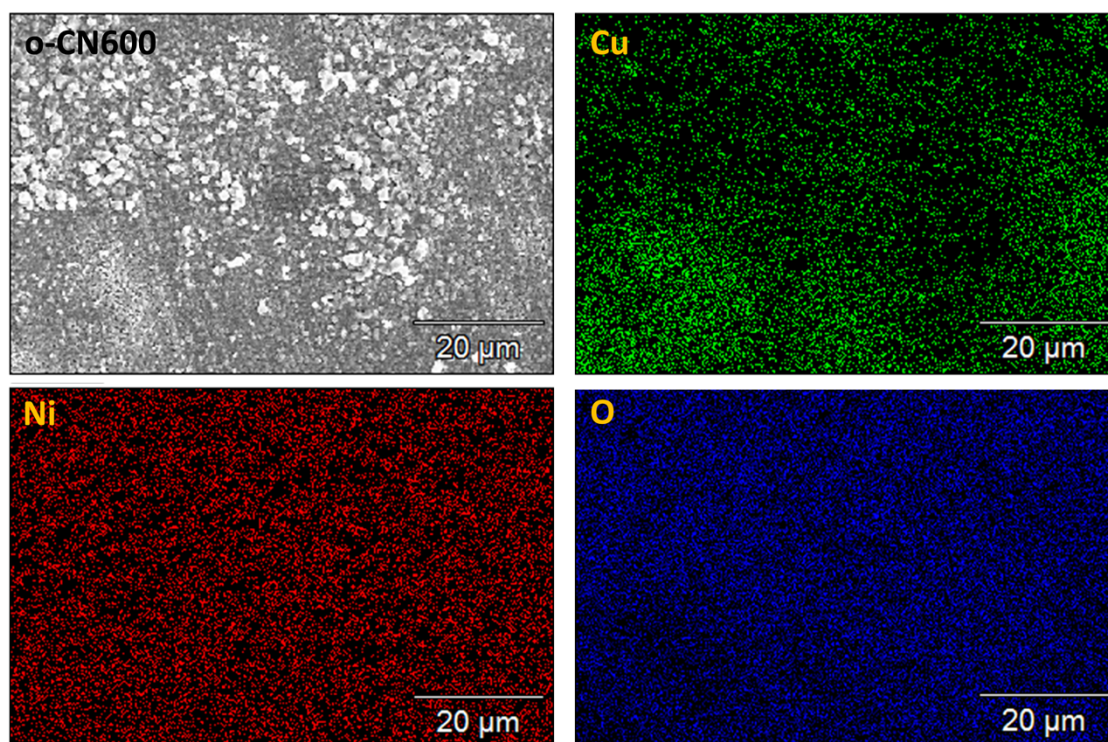

**Figure S2:** Elemental mapping of the CN electrode annealed at 600 °C (o-CN600), showing the distribution of Cu, Ni, and O.

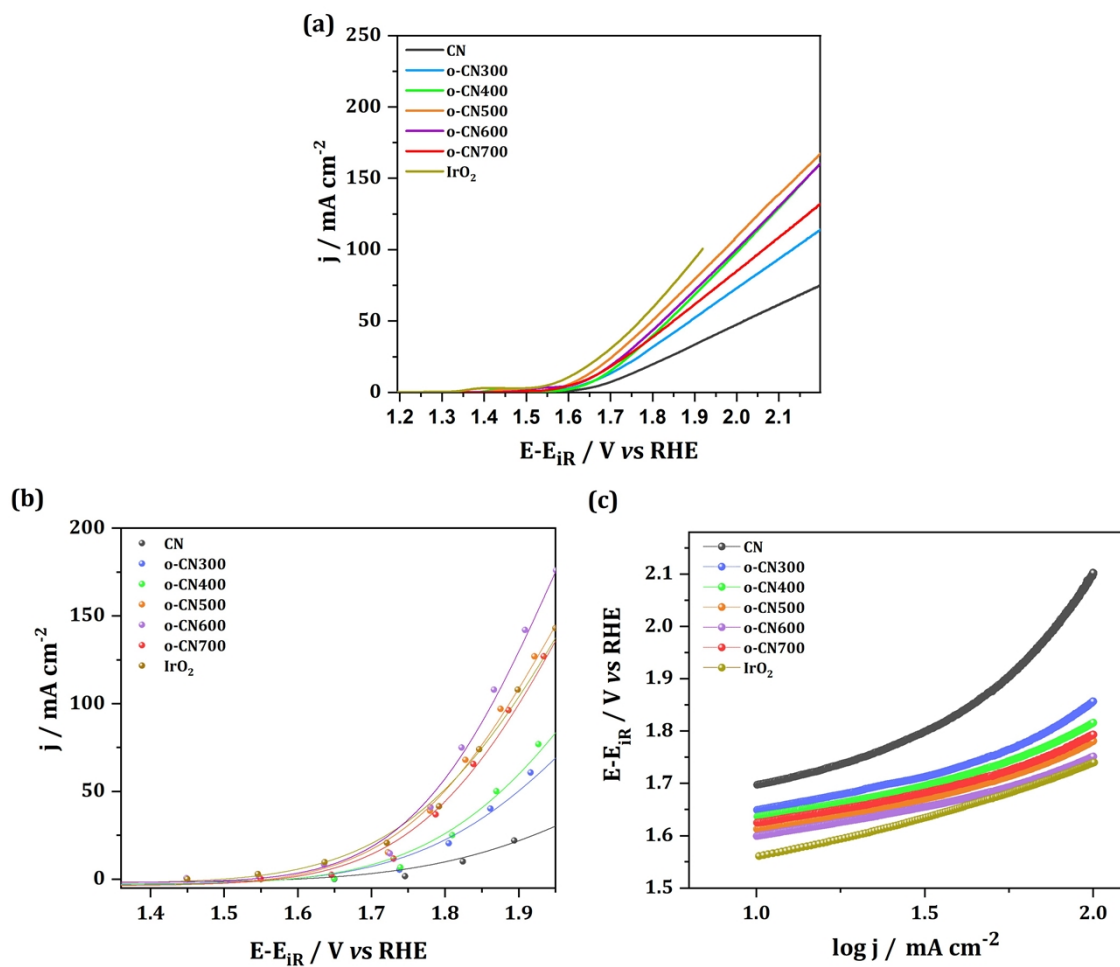

**Figure S3:** OER LSV curves of CN, o-CNX, and IrO<sub>2</sub>/Ni without  $iR_u$  correction (a), SCV curves of CN and o-CNX (b), and corresponding Tafel plots derived from the LSV curves of CN and o-CNX (c).

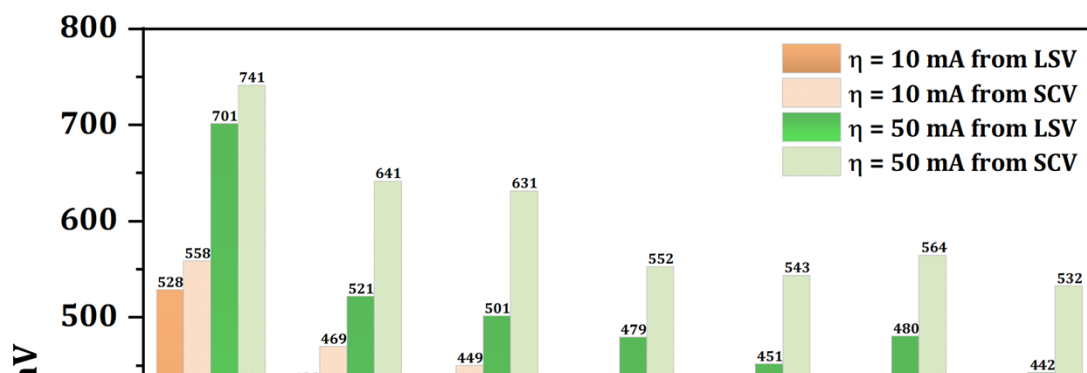

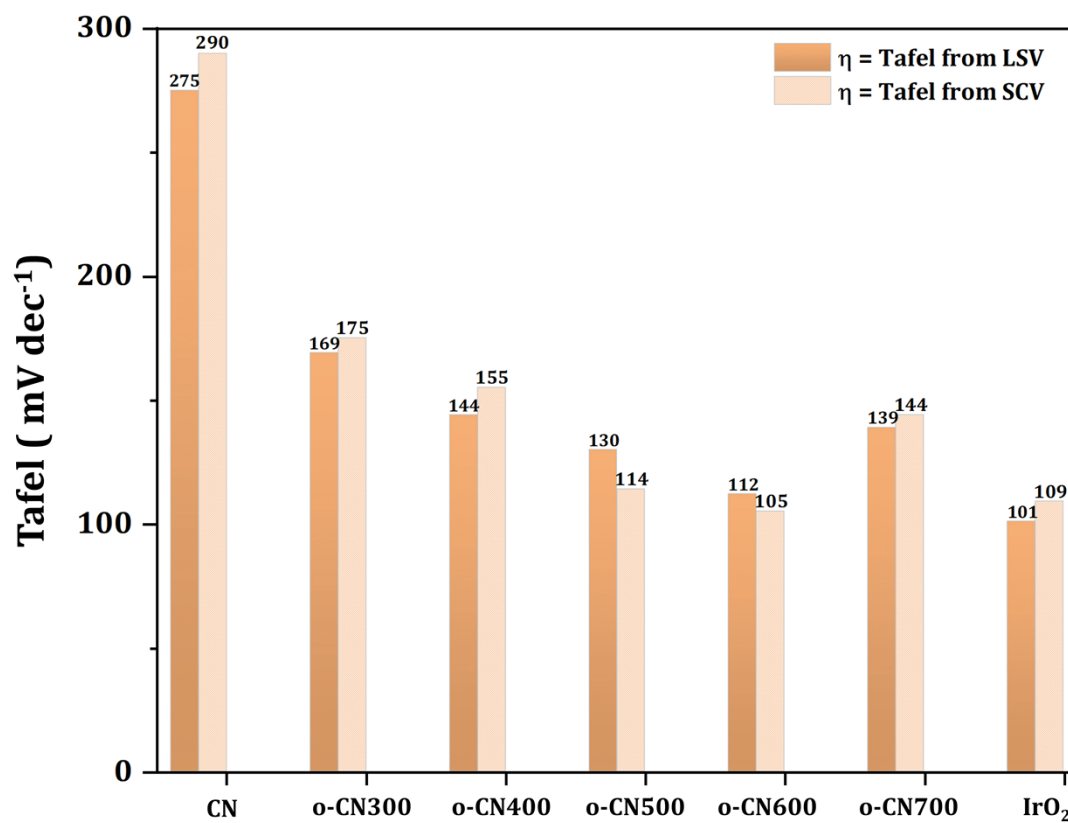

**Figure S4:** Overpotential comparison at 10 and 50 mA obtained from both LSV and SCV analyses.

**Figure S5:** Tafel comparison obtained from both LSV and SCV analyses.

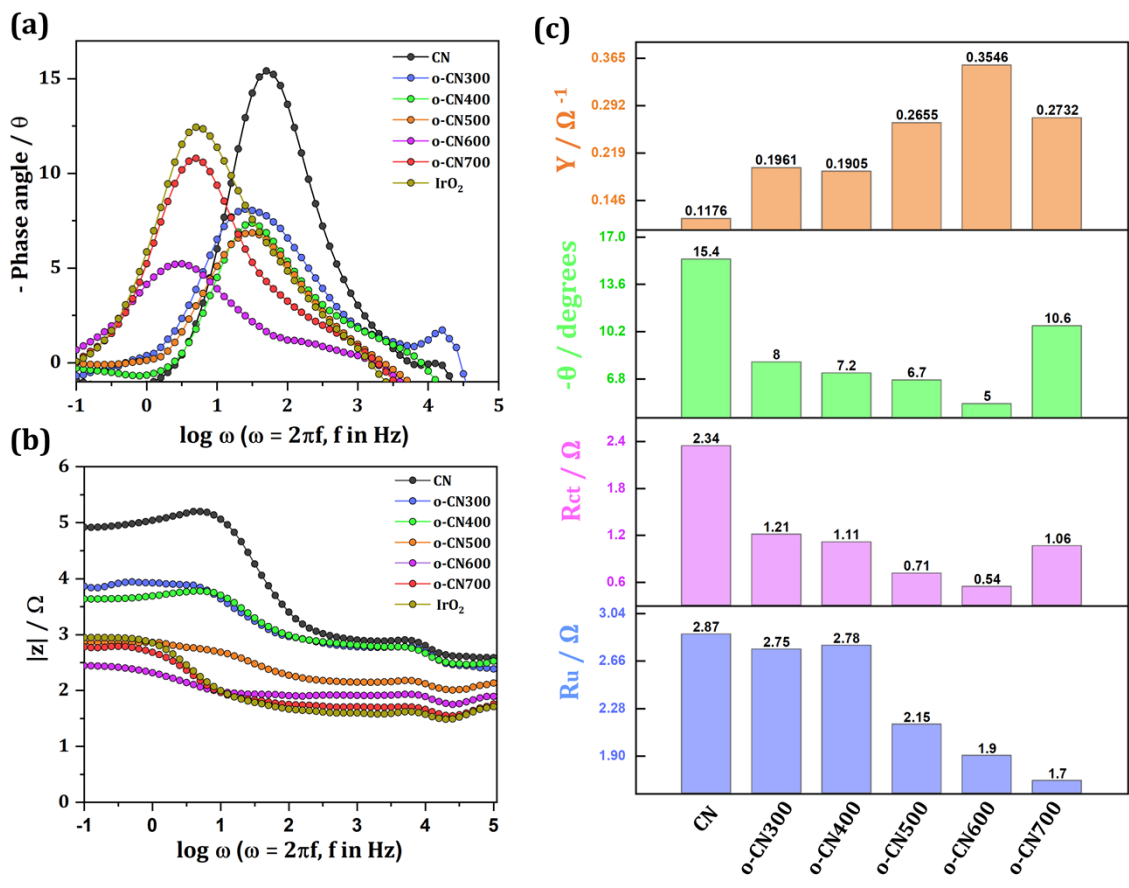

**Figure S6:** Bode phase-angle spectra (a); Bode magnitude plot showing the absolute impedance (b); and the corresponding EIS-derived parameters (c) for the CN and o-CNX during the OER process.

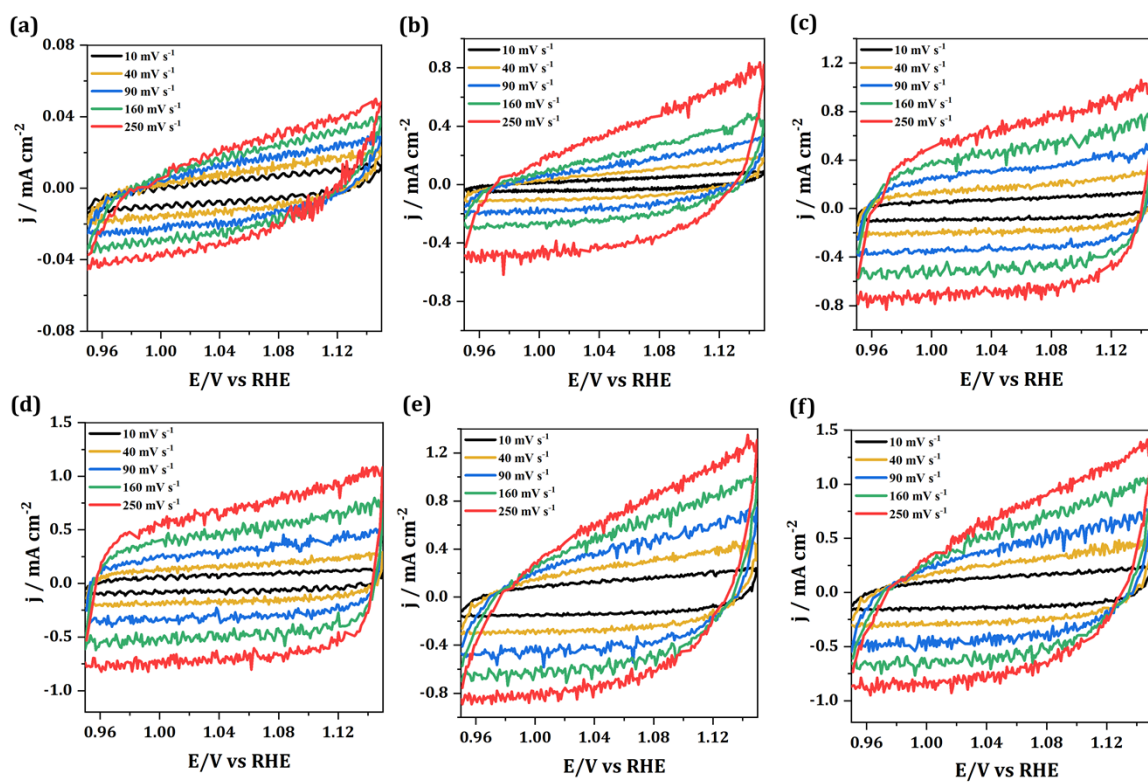

**Figure S7:** Panels (a–f) illustrate the electrochemical behavior within the non-Faradaic region of o-CNX.

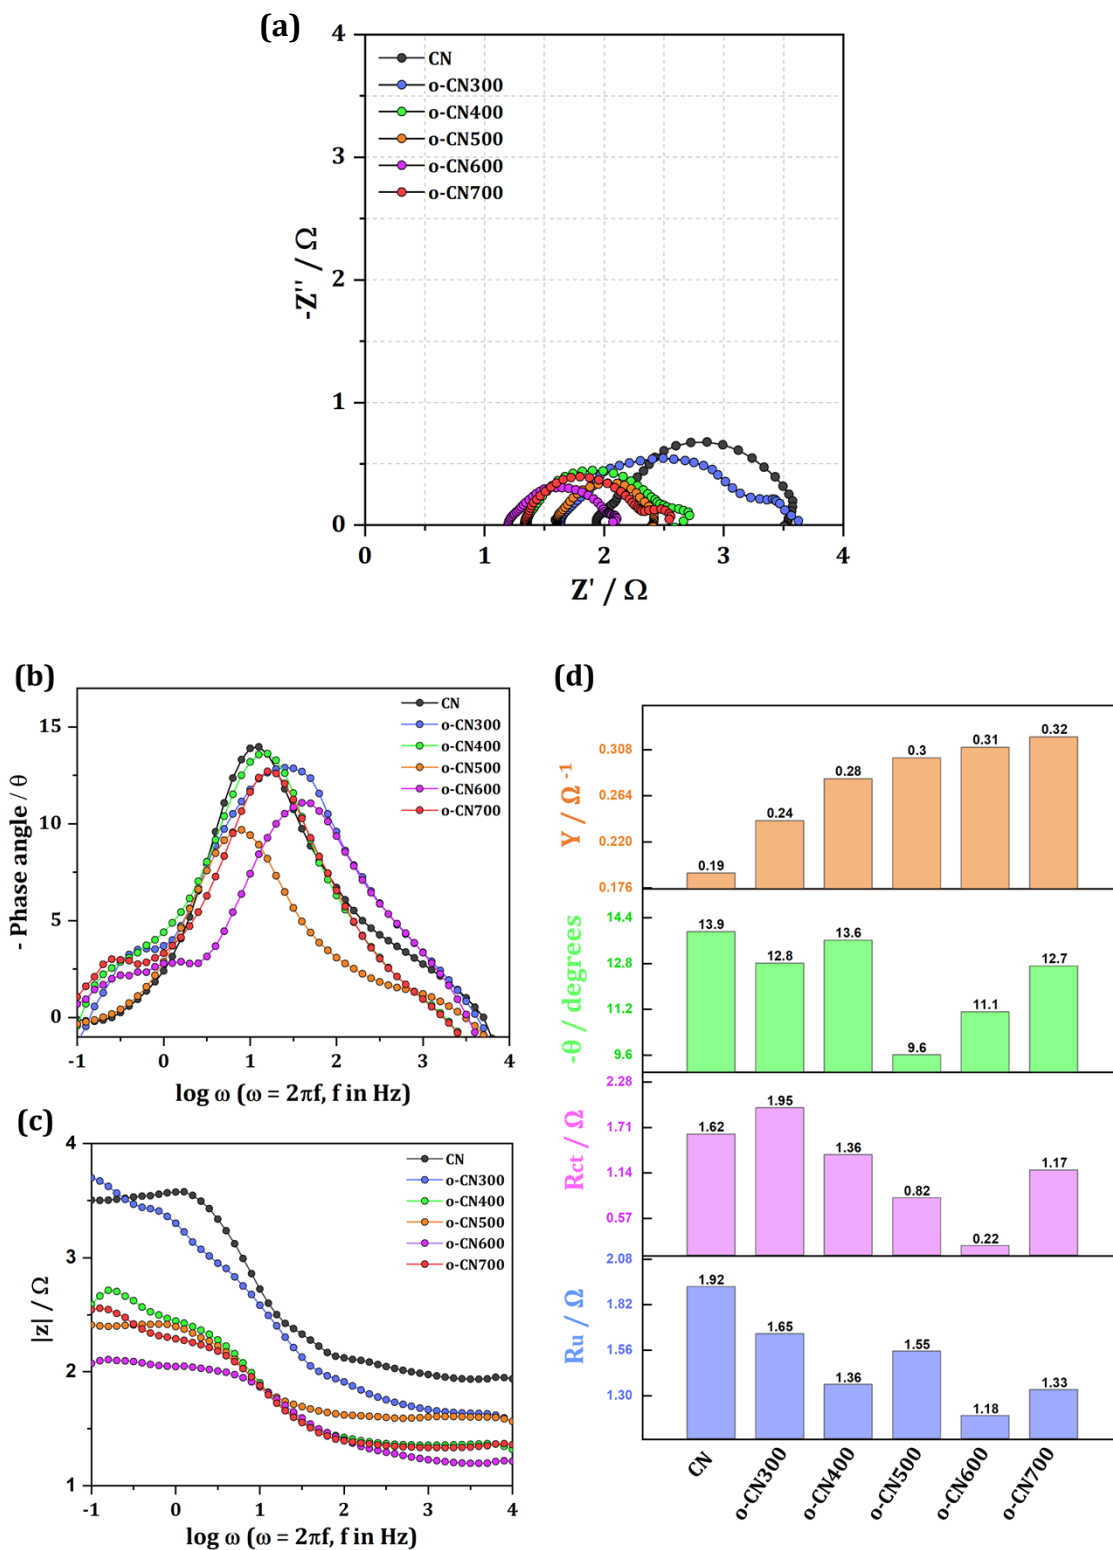

**Figure S8:** Nyquist plots for the CN and o-CNX series (a); Bode phase-angle plot (b); Bode magnitude plot showing the absolute impedance (c); and the corresponding EIS-derived parameters (d) for the CN and o-CNX during the MOR process.

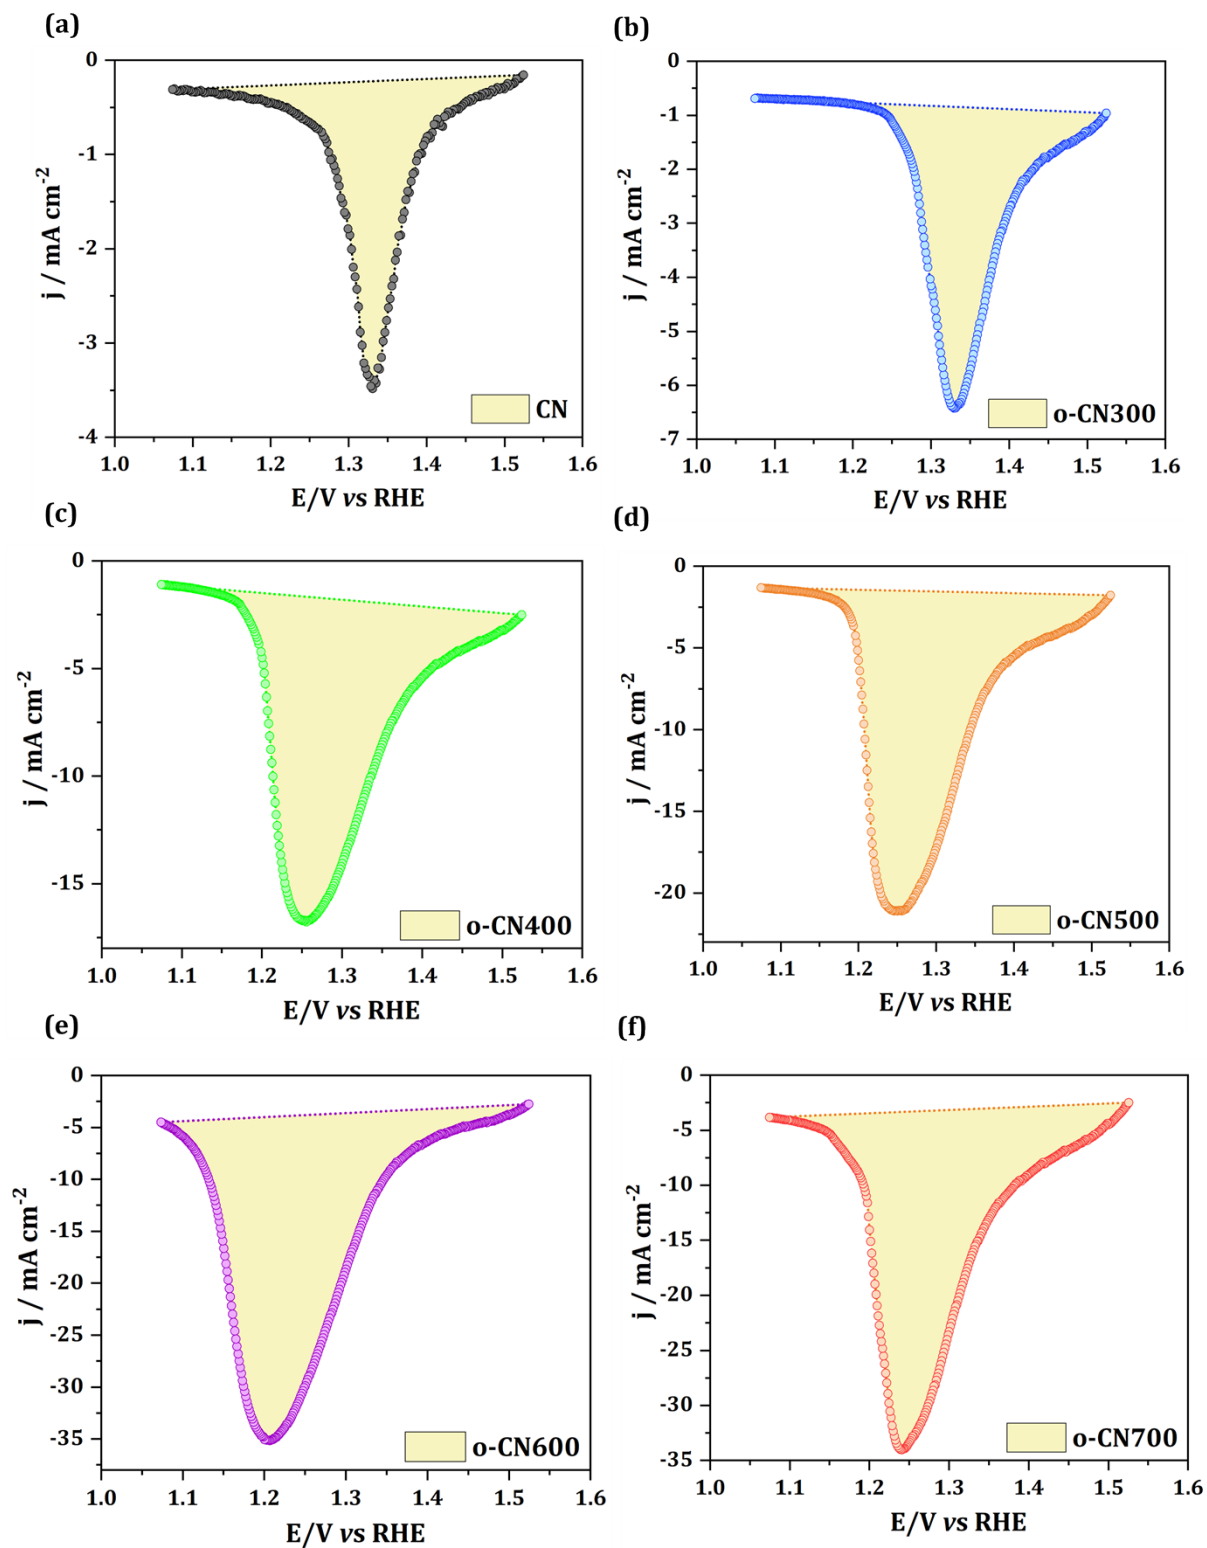

**Figure S9:** Backward CV scans collected for CN and o-CNX in 1.0 M KOH, serving as the basis for evaluating the ECAS (a–f).

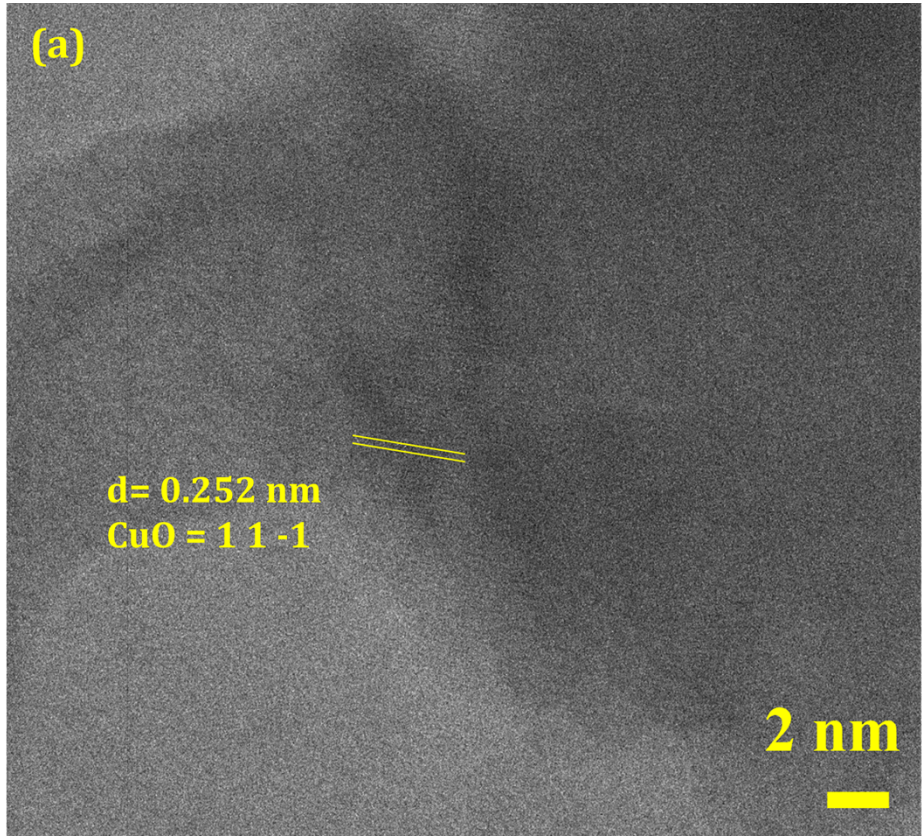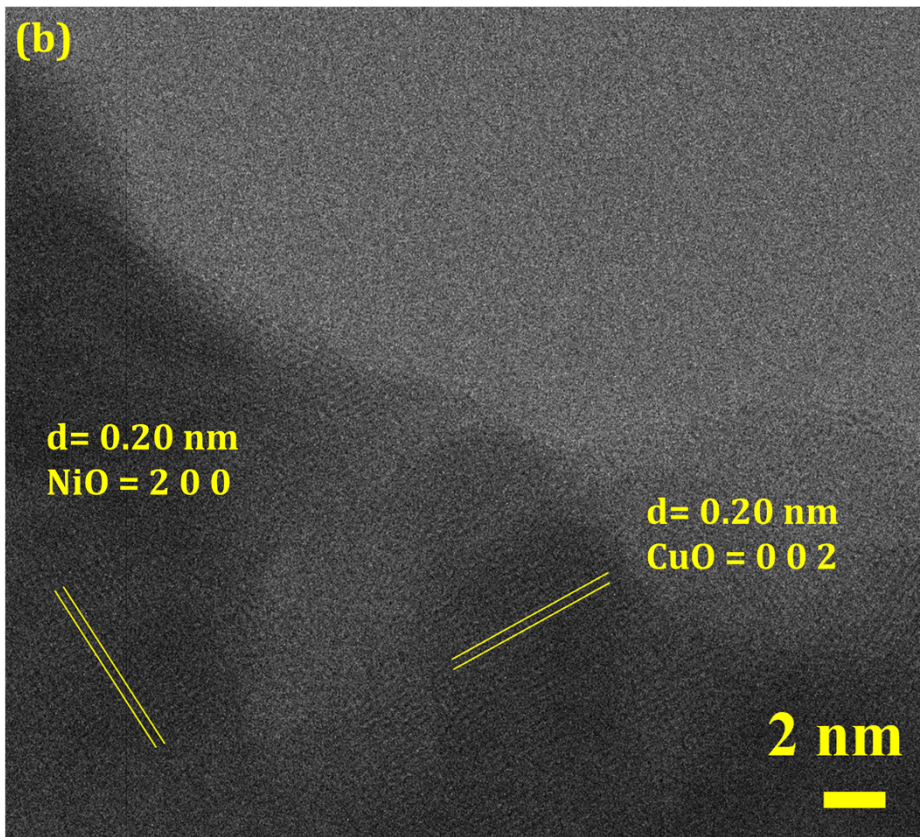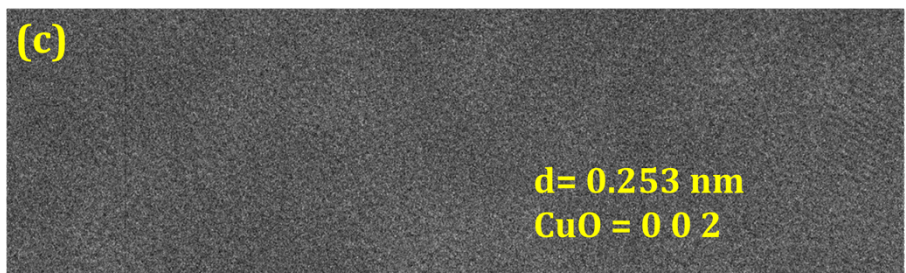

**Figure S10.** High-resolution HRTEM images of the o-CN500, o-CN600, and o-CN700 samples shown in Figure 3. Panels are labeled in this figure as (a) - (c), corresponding to the main manuscript labels k, o, and s, respectively.

## XPS Analysis and Mechanistic Insight:

**Table S1.** XPS-derived Ni<sup>2+</sup>/Ni<sup>3+</sup> ratios of the o-CN600 catalyst before and after the stability test

| <b>o-CN600</b>   | <b>Ni<sup>2+</sup>/Ni<sup>3+</sup></b> | <b>%Ni<sup>2+</sup></b> | <b>%Ni<sup>3+</sup></b> |
|------------------|----------------------------------------|-------------------------|-------------------------|
| Before Stability | 1.13                                   | 53.08                   | 46.92                   |
| After Stability  | 1.83                                   | 64.59                   | 35.41                   |

**Table S2.** Comparison of the OER electrocatalytic performance of recently reported Cu–Ni-based catalysts and the present o-CN600 catalyst in alkaline electrolyte. The overpotential ( $\eta$ ) values are compared at their corresponding current densities.

| <b>S. No.</b> | <b>Catalyst</b>                                                                                       | <b>OER Overpotential (<math>\eta</math>)</b> | <b>Current Density (mA cm<sup>-2</sup>)</b> |
|---------------|-------------------------------------------------------------------------------------------------------|----------------------------------------------|---------------------------------------------|
| 1             | CuNiPx-GDY (1:1) <sup>1</sup>                                                                         | 178 mV                                       | 10 mA cm <sup>-2</sup>                      |
| 2             | CuNiPd (CNP-3) <sup>2</sup>                                                                           | 256 mV                                       | 10 mA cm <sup>-2</sup>                      |
| 3             | (Co <sub>0.21</sub> Ni <sub>0.25</sub> Cu <sub>0.54</sub> ) <sub>3</sub> Se <sub>2</sub> <sup>3</sup> | 272 mV                                       | 10 mA cm <sup>-2</sup>                      |
| 4             | CuNi/CoFe LDH@NF <sup>4</sup>                                                                         | 268 mV                                       | 50 mA cm <sup>-2</sup>                      |
| 5             | CuNi@NiFeCu <sup>5</sup>                                                                              | 285 mV                                       | 50 mA cm <sup>-2</sup>                      |
| 6             | Cu <sub>50</sub> Ni <sub>50</sub> NP <sup>6</sup>                                                     | 318 mV                                       | 10 mA cm <sup>-2</sup>                      |
| 7             | CuNi@Ni(ON)/CNTs-Gr <sup>7</sup>                                                                      | 410 mV                                       | 100 mA cm <sup>-2</sup>                     |
| <b>8</b>      | <b>o-CN600 (Present work)</b>                                                                         | <b>372 mV</b>                                | <b>10 mA cm<sup>-2</sup></b>                |

## REFERENCES

1. J. Gao, Y. Li, X. Yu and Y. Ma, *J. Colloid Interface Sci.*, 2022, **628**, 508–518.
2. M. A. Ehsan, S. Manzoor, S. A. Khan, A. S. Hakeem, M. Mansha, S. Ali and S. I. Allakhverdiev, *J. Ind. Eng. Chem.*, 2025, **146**, 421–430.
3. X. Cao, E. Johnson and M. Nath, *J. Mater. Chem. A*, 2019, **7**, 1646–1651.
4. D. Wang, Y. Chu, Y. Wu, M. Zhu, L. Pan, R. Li, Y. Chen, W. Wang, N. Mitsuzaki and Z. Chen, *J. Mater. Chem. A*, 2024, **12**, 33680–33688.
5. D. Cao, H. Xu and D. Cheng, *Appl. Catal. B*, 2021, **298**, 120600.
6. E. Gioria, S. Li, A. Mazheika, R. Naumann d'Alnoncourt, A. Thomas and F. Rosowski, *Angew. Chem. Int. Ed.*, 2023, **62**, e202217888.
7. D. T. Tran, V. H. Hoa, S. Prabhakaran, D. H. Kim, N. H. Kim and J. H. Lee, *Appl. Catal. B*, 2021, **294**, 120263.
